# Supplementary material for: UPLC-QTOF-MS/MS and GC-MS Characterization of Phytochemicals in Vegetable Juice Fermented Using Lactic Acid Bacteria from Kimchi and Their Antioxidant Potential
Source: MDPI journal article supplement (doi:10.3390/antiox10111761), 2021-11-04
Supplement: s1 [file s1]

## Total Ion Chromatogram

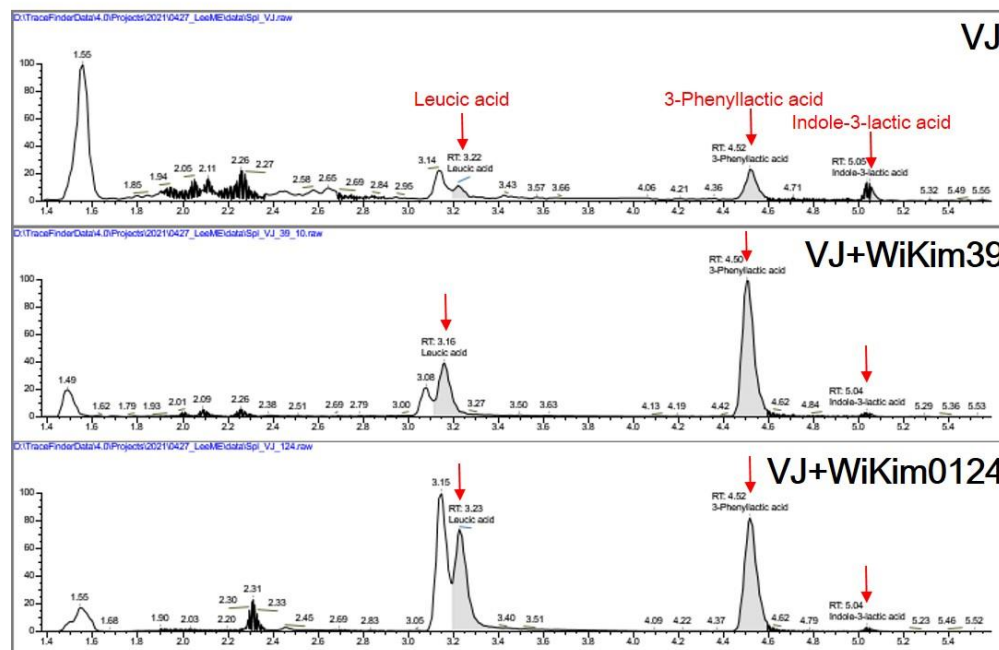

## MS/MS

Leucic acid

3-Phenyllactic acid

Indole-3-lactic acid

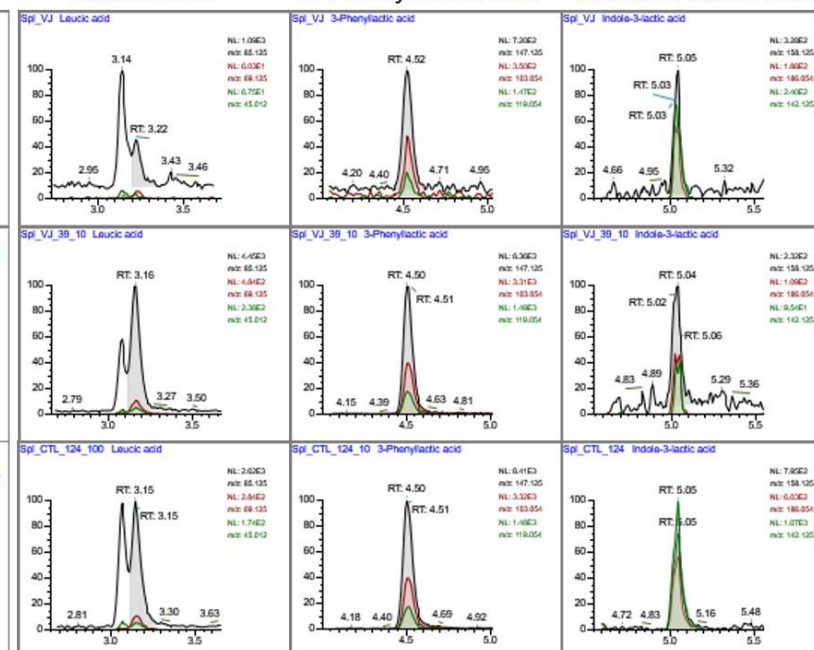

**Supplementary Fig. S1. Total Ion Chromatogram obtained using UPLC-QTOF-MS/MS.** Quantification of significantly differentiated compounds from UPLC-QTOF-MS/MS profile.

UPLC-QTOF-MS/MS: ultra-performance liquid chromatography with quadrupole time-of-flight tandem mass spectrometry

## Total Ion Chromatogram

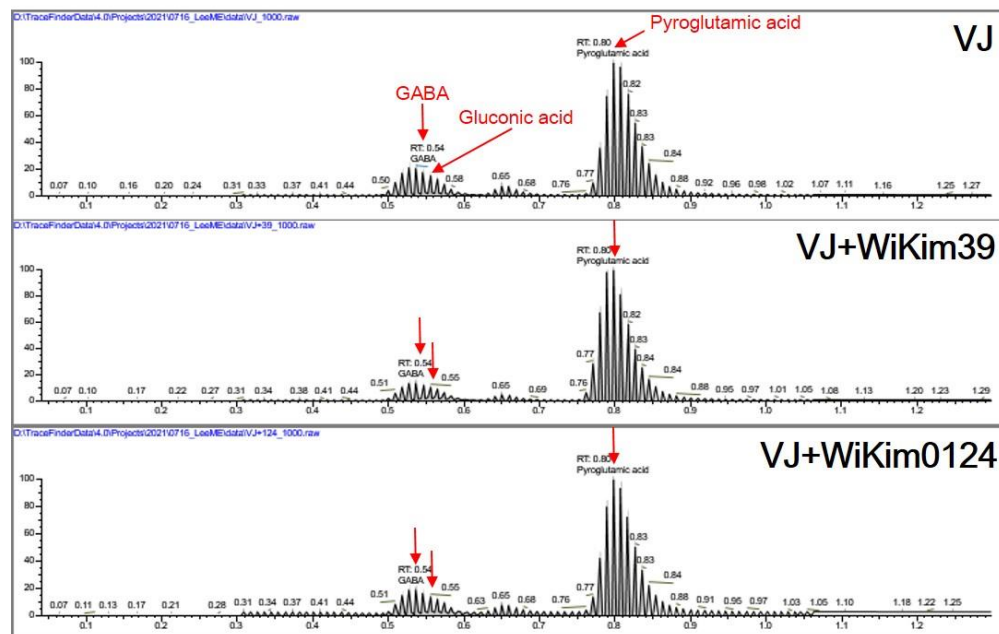

## MS/MS

$\gamma$ -Aminobutyric acid

Gluconic acid

Pyroglutamic acid

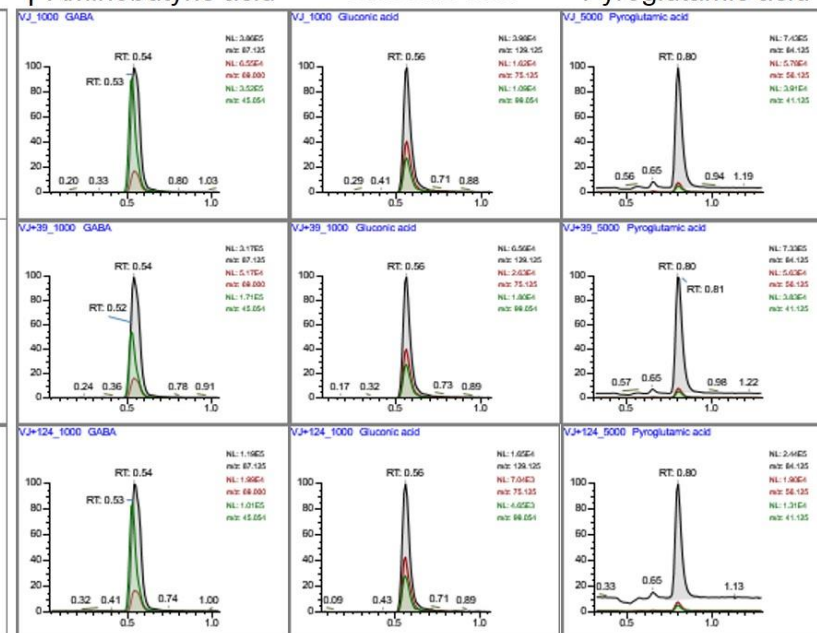

**Supplementary Fig. S2. Total Ion Chromatogram obtained by UPLC-QTOF-MS/MS. Quantification of significantly differentiated compounds from GC-MS profile.**

GC-MS: gas chromatography-mass spectrometry, UPLC-QTOF-MS/MS: ultra-performance liquid chromatography with quadrupole time-of-flight tandem mass spectrometry

Supplementary Table S1. Detailed analytical conditions of UPLC-QTOF-MS/MS.

| Instrument                      | TSQ Altis triple-quadrupole mass spectrometer (Thermo Scientific, USA) |
|---------------------------------|------------------------------------------------------------------------|
| Ionization                      | Electrospray ionisation (H-ESI)                                        |
| Negative Ion / Positive Ion (V) | 2500 / 3500                                                            |
| Sheath Gas (Arb)                | 50                                                                     |
| Aux Gas (Arb)                   | 10                                                                     |
| Sweep Gas (Arb)                 | 1                                                                      |
| Ion Transfer Tube Temp (°C)     | 325                                                                    |
| Vaporizer Temp (°C)             | 350                                                                    |
| Scan type                       | Selected reaction monitoring (SRM)                                     |
| Polarity                        | Negative / Positive                                                    |

Supplementary Table S2. Tentatively identified compounds from probiotic vegetable juice samples by GC-MS.

| Class         | Tentative identification              | RT (min) | Molecular Formula                              | Molecular Weight | Fluoranthene equivalent ug/mg |             |               |
|---------------|---------------------------------------|----------|------------------------------------------------|------------------|-------------------------------|-------------|---------------|
|               |                                       |          |                                                |                  | VJ                            | VJ+ WiKim39 | VJ+ WiKim0124 |
| Amino acids   | Alanine_2TMS                          | 17.37    | C <sub>3</sub> H <sub>7</sub> NO <sub>2</sub>  | 116              | 0.013                         | 0.134       | 0.196         |
|               | Valine_2TMS                           | 23.17    | C <sub>5</sub> H <sub>11</sub> NO <sub>2</sub> | 142              | 0.021                         | 0.083       | 0.121         |
|               | Glycine_3TMS                          | 23.38    | C <sub>2</sub> H <sub>5</sub> NO <sub>2</sub>  | 174              | 0.096                         | 0.655       | 0.175         |
|               | Pyroglutamic acid_2TMS <sup>a</sup>   | 29.09    | C <sub>5</sub> H <sub>7</sub> NO <sub>3</sub>  | 156              | 1.558                         | 20.438      | 8.650         |
|               | γ-Aminobutyric acid_3TMS <sup>a</sup> | 29.30    | C <sub>4</sub> H <sub>9</sub> NO <sub>2</sub>  | 174              | 0.592                         | 4.362       | 1.300         |
|               | Proline_2TMS                          | 39.74    | C <sub>5</sub> H <sub>9</sub> NO <sub>2</sub>  | 217              | 0.004                         | 0.007       | 0.246         |
|               | Serine_2TMS                           | 43.38    | C <sub>3</sub> H <sub>7</sub> NO <sub>3</sub>  | 103              | ND                            | 0.341       | 0.092         |
| Fatty acids   | Propanoic acid_1TMS                   | 16.52    | C <sub>3</sub> H <sub>6</sub> O <sub>2</sub>   | 147              | 0.017                         | 0.469       | 0.004         |
|               | Stearic acid_1TMS                     | 45.44    | C <sub>18</sub> H <sub>36</sub> O <sub>2</sub> | 319              | 0.338                         | 0.421       | 0.063         |
|               | Palmitic acid_1TMS                    | 51.79    | C <sub>16</sub> H <sub>32</sub> O <sub>2</sub> | 217              | 0.692                         | 0.445       | 0.071         |
|               | Oleic acid_1TMS                       | 55.63    | C <sub>18</sub> H <sub>34</sub> O <sub>2</sub> | 117              | 0.063                         | 0.072       | 0.013         |
| Organic acids | Lactic acid_2TMS                      | 16.00    | C <sub>3</sub> H <sub>6</sub> O <sub>3</sub>   | 147              | 0.071                         | 22.645      | 20.433        |
|               | Malic acid_3TMS                       | 22.23    | C <sub>4</sub> H <sub>6</sub> O <sub>5</sub>   | 174              | 0.963                         | ND          | ND            |
|               | Glyceric acid_3TMS                    | 23.94    | C <sub>3</sub> H <sub>6</sub> O <sub>4</sub>   | 147              | 0.033                         | 0.062       | 0.071         |
|               | Fumaric acid_2TMS                     | 24.57    | C <sub>4</sub> H <sub>4</sub> O <sub>4</sub>   | 245              | 0.021                         | 0.121       | 0.033         |

|               |                     |       |                                                 |     |        |        |        |
|---------------|---------------------|-------|-------------------------------------------------|-----|--------|--------|--------|
|               | Citric acid_4TMS    | 28.09 | C <sub>6</sub> H <sub>8</sub> O <sub>7</sub>    | 147 | 0.058  | 1.679  | 0.342  |
|               | Gluconic acid_6TMS  | 48.50 | C <sub>6</sub> H <sub>12</sub> O <sub>7</sub>   | 147 | 0.071  | 2.562  | 0.304  |
|               | Glycolic acid_2TMS  | 42.96 | C <sub>2</sub> H <sub>4</sub> O <sub>3</sub>    | 103 | 0.029  | 0.403  | 0.092  |
|               | Succinic acid_2TMS  | 50.60 | C <sub>4</sub> H <sub>6</sub> O <sub>4</sub>    | 117 | 0.054  | 0.821  | 0.225  |
| Sugar         | Fructose_5TMS       | 22.01 | C <sub>6</sub> H <sub>12</sub> O <sub>6</sub>   | 116 | 0.029  | 0.410  | 0.100  |
|               | Arabinose_4TMS      | 33.32 | C <sub>5</sub> H <sub>10</sub> O <sub>5</sub>   | 103 | 0.013  | 0.114  | 0.042  |
|               | Inositol_6TMS       | 37.80 | C <sub>6</sub> H <sub>12</sub> O <sub>6</sub>   | 292 | 0.017  | 0.155  | 0.029  |
|               | Maltose_8TMS        | 40.56 | C <sub>12</sub> H <sub>22</sub> O <sub>11</sub> | 147 | 0.529  | 0.138  | 0.921  |
|               | Mannose_5TMS        | 44.90 | C <sub>6</sub> H <sub>12</sub> O <sub>6</sub>   | 205 | 30.417 | 13.617 | 23.067 |
|               | Myoinositol_6TMS    | 46.80 | C <sub>6</sub> H <sub>12</sub> O <sub>6</sub>   | 217 | 0.225  | 0.800  | 0.413  |
|               | D-Glucose_5TMS      | 47.81 | C <sub>6</sub> H <sub>12</sub> O <sub>6</sub>   | 204 | 18.671 | 5.559  | 12.104 |
|               | Fructofuranose_5TMS | 49.58 | C <sub>6</sub> H <sub>12</sub> O <sub>6</sub>   | 217 | ND     | 0.162  | 0.017  |
|               | Allose_6TMS         | 53.25 | C <sub>6</sub> H <sub>12</sub> O <sub>6</sub>   | 319 | 0.088  | 4.045  | 0.342  |
|               | Mannitol_6TMS       | 56.29 | C <sub>6</sub> H <sub>14</sub> O <sub>6</sub>   | 117 | ND     | 0.579  | 0.017  |
|               | Sucrose_8TMS        | 63.71 | C <sub>12</sub> H <sub>22</sub> O <sub>11</sub> | 361 | 5.746  | 0.776  | 0.7179 |
| Miscellaneous | Ribonic acid_5TMS   | 20.76 | C <sub>5</sub> H <sub>10</sub> O <sub>6</sub>   | 144 | 0.013  | 0.183  | 0.025  |
|               | Aminoethanol_3TMS   | 23.58 | C <sub>2</sub> H <sub>7</sub> NO                | 147 | 0.133  | 0.645  | 0.229  |

<sup>a</sup>, The compound was further identified using the corresponding standard compound. ND, not detected.

Supplementary Table S3. Quantitative characterization of significant phytochemical compounds in VJ samples by UPLC-QTOF-MS/MS.

| Compound name        | RT<br>(min) | Ionization<br>(ESI <sup>-</sup> /ESI <sup>+</sup> ) | Molecular ion<br>(m/z) | MSMS<br>products ions<br>(m/z) | Collision<br>energy (V) | (ng/mL)         |                 |                  |
|----------------------|-------------|-----------------------------------------------------|------------------------|--------------------------------|-------------------------|-----------------|-----------------|------------------|
|                      |             |                                                     |                        |                                |                         | VJ              | VJ+<br>WiKim39  | VJ+<br>WiKim0124 |
| D-Leucic acid        | 3.01        | [M-H] <sup>-</sup>                                  | 131                    | 45.01                          | 13.76                   |                 |                 |                  |
|                      |             |                                                     |                        | 69.13                          | 20.42                   | 34.18 ± 0.25    | 3532.82 ± 3.98  | 3147.06 ± 4.16   |
|                      |             |                                                     |                        | 85.13                          | 12.25                   |                 |                 |                  |
| Indole-3-lactic acid | 3.95        | [M-H] <sup>-</sup>                                  | 204                    | 142.13                         | 18.48                   |                 |                 |                  |
|                      |             |                                                     |                        | 158.13                         | 15.15                   | 24.59 ± 0.58    | 226.34 ± 5.18   | 59.19 ± 1.15     |
|                      |             |                                                     |                        | 186.05                         | 13.47                   |                 |                 |                  |
| 3-Phenyllactic acid  | 4.26        | [M-H] <sup>-</sup>                                  | 165                    | 103.05                         | 15.70                   |                 |                 |                  |
|                      |             |                                                     |                        | 119.05                         | 16.79                   | 23.59 ± 0.58    | 2693.67 ± 8.96  | 819.57 ± 0.62    |
|                      |             |                                                     |                        | 147.13                         | 11.23                   |                 |                 |                  |
| γ-Aminobutyric acid  | 0.54        | [M+H] <sup>+</sup>                                  | 104.09                 | 45.05                          | 21.01                   |                 |                 |                  |
|                      |             |                                                     |                        | 69.00                          | 15.49                   | 1728.70 ± 13.90 | 4334.11 ± 16.33 | 2245.83 ± 56.45  |
|                      |             |                                                     |                        | 87.13                          | 10.52                   |                 |                 |                  |

|                   |      |        |        |        |       |                |                 |                 |
|-------------------|------|--------|--------|--------|-------|----------------|-----------------|-----------------|
|                   |      |        |        | 75.13  | 17.76 |                |                 |                 |
| Gluconic acid     | 0.56 | [M-H]- | 195    | 99.05  | 14.14 | 8080.95 ±34.90 | 27073.61 ±18.27 | 16500.66 ±57.78 |
|                   |      |        |        | 129.13 | 12.20 |                |                 |                 |
|                   |      |        |        | 41.13  | 21.81 |                |                 |                 |
| Pyroglutamic acid | 0.8  | [M+H]+ | 130.04 | 56.13  | 24.12 | 5071.72 ±12.39 | 19741.34 ±65.51 | 12061.11 ±11.83 |
|                   |      |        |        | 84.13  | 13.00 |                |                 |                 |
